# Supplementary material for: Phosphorus speciation analysis of fatty-acid-based feedstocks and fast pyrolysis biocrudes via gel permeation chromatography inductively coupled plasma high-resolution mass spectrometry
Source: Royal Society of Chemistry journal article supplement (doi:10.1039/d1ra03470g), 2021-01-01

## SUPPORTING INFORMATION FOR

### **Phosphorus speciation analysis of fatty-acid-based feedstocks and fast pyrolysis biocrudes via gel permeation chromatography inductively coupled plasma high-resolution mass spectrometry**

Victor Garcia-Montoto,<sup>a, b</sup> Sylvain Verdier,<sup>c</sup> David C. Dayton,<sup>d</sup> Ofei Mante,<sup>d</sup> Carine Arnaudguilhem,<sup>a</sup> Jan H. Christensen,<sup>b</sup> Brice Bouyssiere<sup>\*,a</sup>

---

<sup>a.</sup> Université de Pau et des Pays de l'Adour, E2S UPPA, CNRS, Institut des Sciences Analytiques et de Physico-chimie pour l'Environnement et les Matériaux (IPREM), UMR5254, 64000 Pau, France.

<sup>b.</sup> Department of Plant and Environmental Sciences, University of Copenhagen, Thorvaldesensvej 40, 1871 Frederiksberg C, Denmark

<sup>c.</sup> Haldor Topsoe A/S, Haldor Topsøes allé 1, 2800 Kgs. Lyngby, Denmark.

<sup>d.</sup> Energy Technology Division, RTI International, Research Triangle Park, NC 27709, USA

**Caption to tables:**

**Table S1.** Classification of the chromatogram peaks into four size fractions.

**Caption to Figures:**

**Figure S1.** GPC-UV-VIS calibration chromatogram of 10 polystyrene standards dissolved in THF. The mass in Da of the eluted compound is provided on the top of each peak.

**Figure S2.** GPC-UV-VIS calibration curve.

**Figure S3.** Bar plot representing the chromatographic distribution of the phosphorus species in both fresh and three months old biocrude xylene soluble extracts (XSE) divided into four size fractions.

**Figure S4.** Bar plot representing the chromatographic distribution of the phosphorus species in both fresh and three months old biocrude xylene insoluble extracts (XIE) divided into four size fractions.

**Table S1.** Classification of the chromatogram peaks into four size fractions.

| Fraction | $t_R$ [min] | Estimated molecular weight [Da] |
|----------|-------------|---------------------------------|
| F1       | 13 – 20     | > 315 000 – 75 000              |
| F2       | 20 – 25     | 75 000 – 1 400                  |
| F3       | 25 – 28     | 1 400 – 320                     |
| F4       | > 28        | < 320                           |

**Figure S1.** GPC-UV-VIS calibration chromatogram of 10 polystyrene standards dissolved in THF. The mass in Da of the eluted compound is provided on the top of each peak.

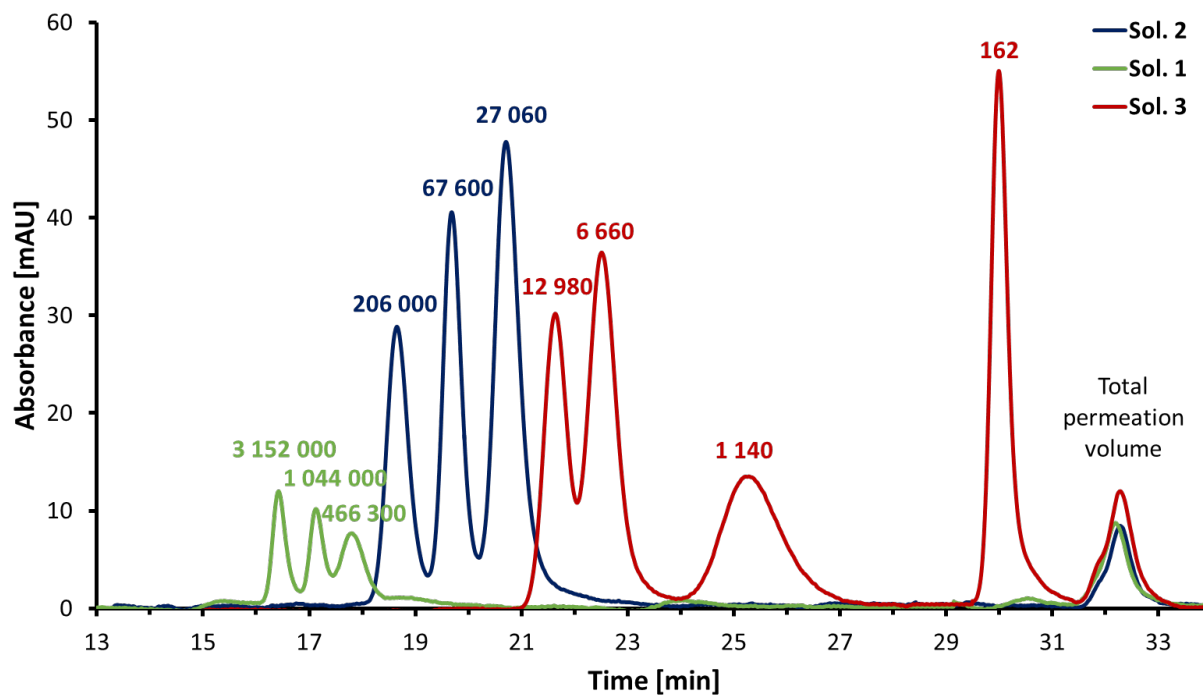

**Figure S2.** GPC-UV-VIS calibration curve.

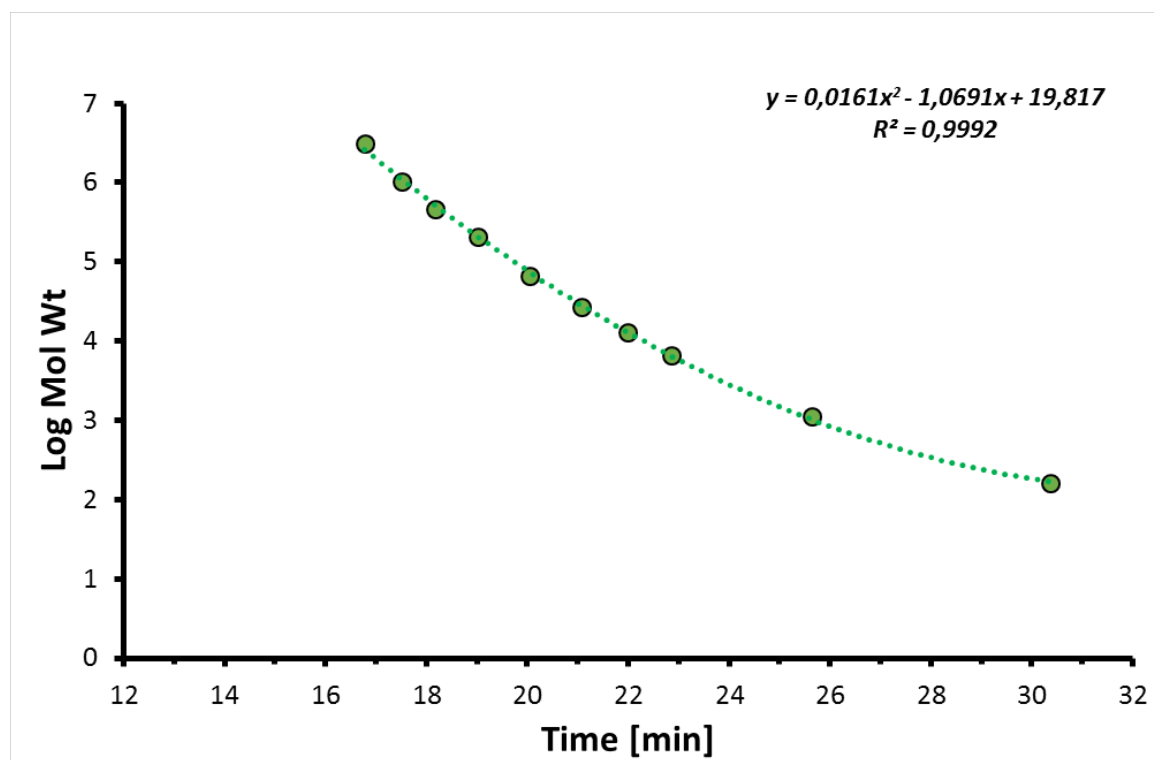

**Figure S3.** Bar plot representing the chromatographic distribution of the phosphorus species in both fresh and three months old biocrude xylene soluble extracts (XSE) divided into four size fractions.

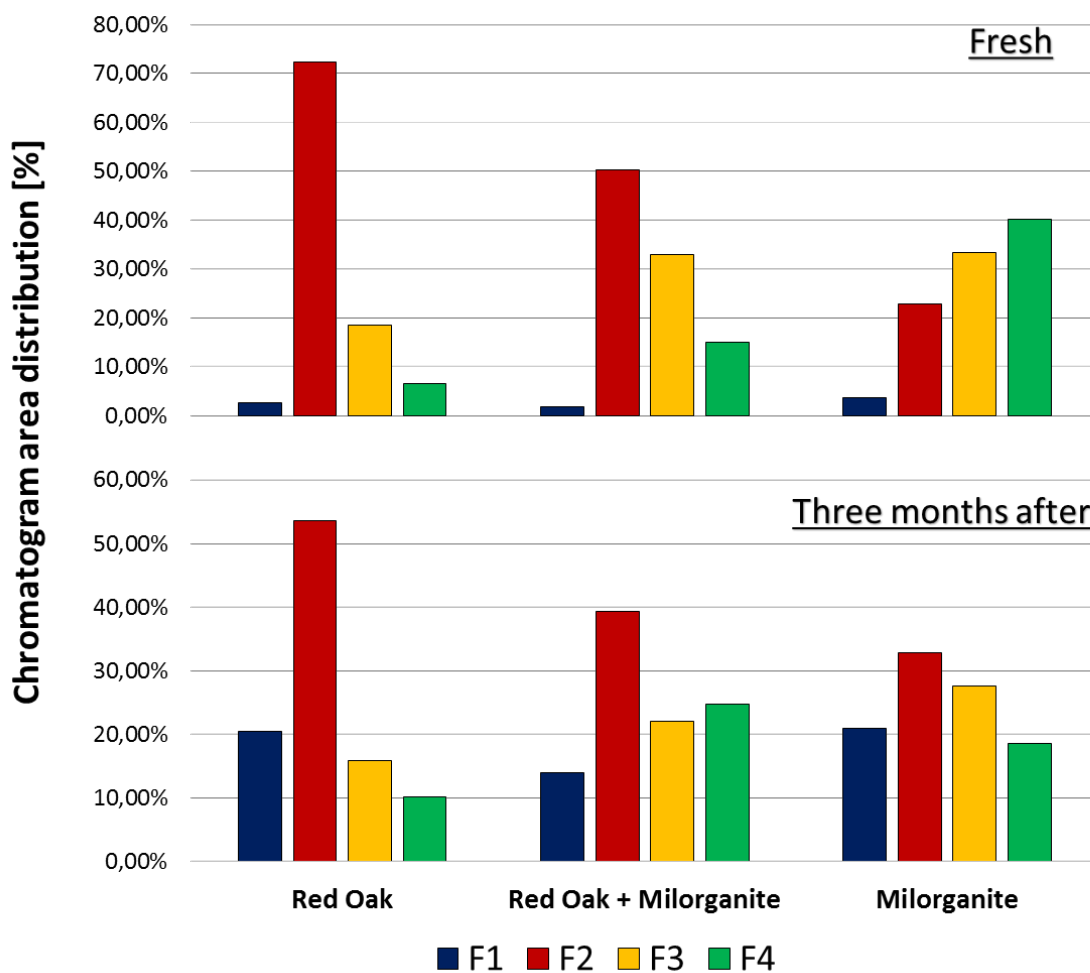

**Figure S4.** Bar plot representing the chromatographic distribution of the phosphorus species in both fresh and three months old biocrude xylene insoluble extracts (XIE) divided into four size fractions

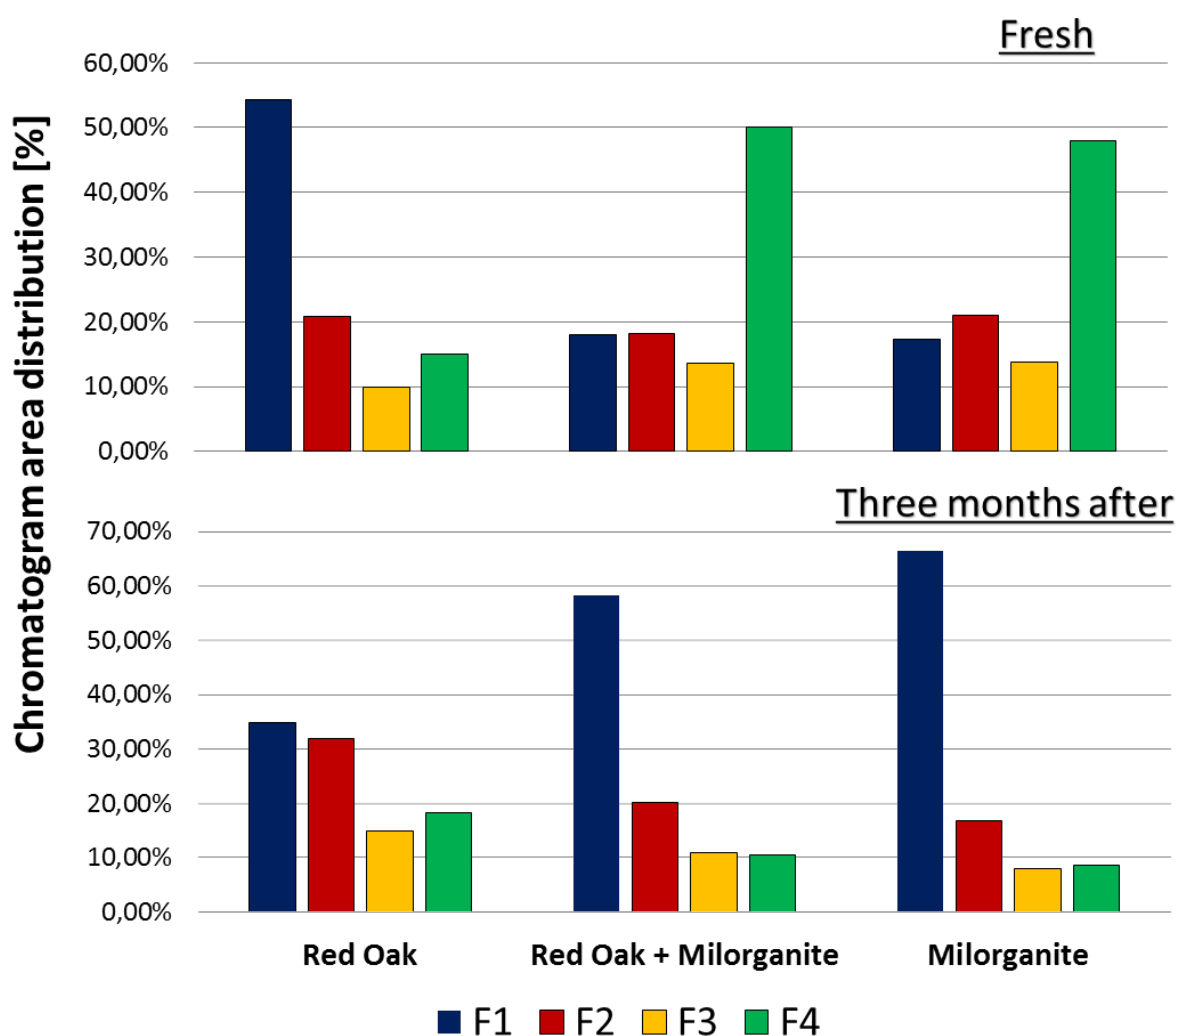

Supplement: d1ra03470g1.pdf [file d1ra03470g1.pdf]
